# Supplementary material
Source: MDPI journal article supplement (https://www.mdpi.com/2072-4292/16/3/468)
Supplement: s1 [file s1]

# Spatiotemporal distributions of the thunderstorm and lightning structures over the Qinghai–Tibet Plateau

Table S1 to S2

**Table S1.** The corresponding standard deviations of Figure 4 (a), Figure 6 (a) and Figure 8 (a).

|                                                                                 | Sep  | Mar                  | Apr                  | May                  | Jun                  | Jul                  | Aug                  | Sep                  | Oct                  | Nov  |
|---------------------------------------------------------------------------------|------|----------------------|----------------------|----------------------|----------------------|----------------------|----------------------|----------------------|----------------------|------|
| $RH_{20dBZ}$ (km)                                                               |      | 1.3                  | 1.5                  | 1.6                  | 2.1                  | 2.1                  | 2.2                  | 2.1                  | 1.6                  |      |
| $RH_{30dBZ}$ (km)                                                               |      | 1.5                  | 1.4                  | 1.5                  | 1.8                  | 1.8                  | 1.9                  | 1.9                  | 1.5                  |      |
| $H_{20dBZ}$ (km)                                                                |      | 1.7                  | 1.4                  | 1.4                  | 2.0                  | 2.1                  | 2.1                  | 2.0                  | 1.5                  |      |
| $H_{30dBZ}$ (km)                                                                |      | 1.6                  | 1.4                  | 1.4                  | 1.7                  | 1.7                  | 1.8                  | 1.8                  | 1.5                  |      |
| $A_{>20dBZ}$ (km <sup>2</sup> )                                                 |      | 2.9×10 <sup>3</sup>  | 3.3×10 <sup>3</sup>  | 2.2×10 <sup>3</sup>  | 2.9×10 <sup>3</sup>  | 2.7×10 <sup>3</sup>  | 2.3×10 <sup>3</sup>  | 2.5×10 <sup>3</sup>  | 1.9×10 <sup>3</sup>  |      |
| $A_{>30dBZ}$ (km <sup>2</sup> )                                                 |      | 232                  | 214                  | 217                  | 710                  | 793                  | 780                  | 598                  | 206                  |      |
| flash rate of thunderstorms (fl min <sup>-1</sup> )                             |      | 1.3                  | 3.6                  | 3.2                  | 3.4                  | 2.2                  | 2.5                  | 2.7                  | 2.0                  |      |
| flash density relative to $A_{>20dBZ}$ (fl km <sup>-2</sup> min <sup>-1</sup> ) |      | 1.7×10 <sup>-3</sup> | 6.7×10 <sup>-3</sup> | 5.0×10 <sup>-3</sup> | 4.9×10 <sup>-3</sup> | 5.3×10 <sup>-3</sup> | 4.5×10 <sup>-3</sup> | 4.3×10 <sup>-3</sup> | 5.2×10 <sup>-3</sup> |      |
| flash density relative to $A_{>30dBZ}$ (fl km <sup>-2</sup> min <sup>-1</sup> ) |      | 1.1×10 <sup>-2</sup> | 1.3×10 <sup>-2</sup> | 1.5×10 <sup>-2</sup> | 1.4×10 <sup>-2</sup> | 1.4×10 <sup>-2</sup> | 1.3×10 <sup>-2</sup> | 1.1×10 <sup>-2</sup> | 1.2×10 <sup>-2</sup> |      |
| flash duration (s)                                                              | 0.17 | 0.24                 | 0.19                 | 0.17                 | 0.17                 | 0.17                 | 0.17                 | 0.18                 | 0.18                 | 0.22 |
| flash footprint (km <sup>2</sup> )                                              | 148  | 187                  | 179                  | 145                  | 175                  | 179                  | 200                  | 203                  | 177                  | 198  |
| flash length (km)                                                               | 5.8  | 7.6                  | 6.9                  | 6.1                  | 6.5                  | 6.8                  | 7.2                  | 7.4                  | 7.2                  | 7.8  |
| flash radiance (J m <sup>-2</sup> sr <sup>-1</sup> μm <sup>-1</sup> )           | 0.7  | 2.6                  | 1.8                  | 1.4                  | 1.1                  | 0.9                  | 0.8                  | 1.2                  | 1.3                  | 1.9  |

**Table S2.** The corresponding standard deviations of Figure 4 (b), Figure 6 (b) and Figure 8 (b).

| Time (LT)                                                                             | 00:00-<br>02:00      | 02:00-<br>04:00      | 04:00-<br>06:00      | 06:00-<br>08:00      | 08:00-<br>10:00      | 10:00-<br>12:00      | 12:00-<br>14:00      | 14:00-<br>16:00      | 16:00-<br>18:00      | 18:00-<br>20:00      | 20:00-<br>22:00      | 22:00-<br>24:00      |
|---------------------------------------------------------------------------------------|----------------------|----------------------|----------------------|----------------------|----------------------|----------------------|----------------------|----------------------|----------------------|----------------------|----------------------|----------------------|
| $RH_{20dBZ}$ (km)                                                                     | 2.1                  | 2.0                  | 1.7                  | 2.4                  | 1.2                  | 1.5                  | 1.8                  | 2.0                  | 2.2                  | 2.3                  | 2.2                  | 2.2                  |
| $RH_{30dBZ}$ (km)                                                                     | 1.7                  | 1.7                  | 1.2                  | 1.9                  | 1.0                  | 1.2                  | 1.5                  | 1.8                  | 2.0                  | 2.0                  | 1.9                  | 1.9                  |
| $H_{20dBZ}$ (km)                                                                      | 1.9                  | 1.7                  | 1.6                  | 2.1                  | 1.1                  | 1.5                  | 1.8                  | 2.0                  | 2.2                  | 2.2                  | 2.1                  | 2.0                  |
| $H_{30dBZ}$ (km)                                                                      | 1.6                  | 1.5                  | 1.3                  | 1.6                  | 0.9                  | 1.2                  | 1.5                  | 1.7                  | 1.9                  | 1.9                  | 1.8                  | 1.7                  |
| $A_{>20dBZ}$ (km <sup>2</sup> )                                                       | $5.5 \times 10^3$    | $6.5 \times 10^3$    | $1.7 \times 10^3$    | 900                  | 739                  | 845                  | 964                  | $1.3 \times 10^3$    | $2.2 \times 10^3$    | $3.6 \times 10^3$    | $4.8 \times 10^3$    | $4.7 \times 10^3$    |
| $A_{>30dBZ}$ (km <sup>2</sup> )                                                       | $2.4 \times 10^3$    | $1.2 \times 10^3$    | 130                  | 239                  | 89                   | 112                  | 188                  | 228                  | 498                  | $1.0 \times 10^3$    | $1.3 \times 10^3$    | $1.6 \times 10^3$    |
| flash rate of<br>thunderstorms<br>(fl min <sup>-1</sup> )                             | 2.4                  | 5.3                  | 2.6                  | 1.0                  | 1.3                  | 1.4                  | 1.6                  | 2.0                  | 2.5                  | 4.6                  | 4.9                  | 3.5                  |
| flash density<br>relative to $A_{>20dBZ}$<br>(fl km <sup>-2</sup> min <sup>-1</sup> ) | $5.6 \times 10^{-3}$ | $3.6 \times 10^{-3}$ | $3.4 \times 10^{-3}$ | $4.0 \times 10^{-3}$ | $5.9 \times 10^{-3}$ | $5.6 \times 10^{-3}$ | $5.1 \times 10^{-3}$ | $4.7 \times 10^{-3}$ | $4.6 \times 10^{-3}$ | $5.2 \times 10^{-3}$ | $5.3 \times 10^{-3}$ | $3.4 \times 10^{-3}$ |
| flash density<br>relative to $A_{>30dBZ}$<br>(fl km <sup>-2</sup> min <sup>-1</sup> ) | $1.8 \times 10^{-2}$ | $1.5 \times 10^{-2}$ | $1.7 \times 10^{-2}$ | $1.8 \times 10^{-2}$ | $2.0 \times 10^{-2}$ | $1.5 \times 10^{-2}$ | $1.3 \times 10^{-2}$ | $1.2 \times 10^{-2}$ | $1.1 \times 10^{-2}$ | $1.4 \times 10^{-2}$ | $1.5 \times 10^{-2}$ | $1.2 \times 10^{-2}$ |
| flash duration<br>(s)                                                                 | 0.21                 | 0.20                 | 0.19                 | 0.21                 | 0.16                 | 0.15                 | 0.16                 | 0.16                 | 0.17                 | 0.18                 | 0.19                 | 0.20                 |

| Time (LT)                                                             | 00:00-02:00 | 02:00-04:00 | 04:00-06:00 | 06:00-08:00 | 08:00-10:00 | 10:00-12:00 | 12:00-14:00 | 14:00-16:00 | 16:00-18:00 | 18:00-20:00 | 20:00-22:00 | 22:00-24:00 |
|-----------------------------------------------------------------------|-------------|-------------|-------------|-------------|-------------|-------------|-------------|-------------|-------------|-------------|-------------|-------------|
| flash footprint (km <sup>2</sup> )                                    | 276         | 302         | 205         | 202         | 138         | 118         | 131         | 151         | 166         | 208         | 234         | 278         |
| flash length (km)                                                     | 8.9         | 9.8         | 7.4         | 7.2         | 9.6         | 5.1         | 5.5         | 6.0         | 6.4         | 7.4         | 8.1         | 9.0         |
| flash radiance (J m <sup>-2</sup> sr <sup>-1</sup> μm <sup>-1</sup> ) | 1.7         | 2.1         | 1.0         | 2.9         | 1.2         | 1.2         | 0.8         | 0.9         | 0.9         | 1.1         | 1.2         | 2.1         |
